# Supplementary material for: Metabolome and Transcriptome Analyses Reveal Different Flavonoid Biosynthesis and Chlorophyll Metabolism Profiles between Red Leaf and Green Leaf of Eucommia ulmoides
Source: MDPI journal article supplement (doi:10.3390/f12091260), 2021-09-16
Supplement: s1 [file s1]

**Supplementary Materials:** The following are available online at [www.mdpi.com/article/10.3390/f12091260/s1](http://www.mdpi.com/article/10.3390/f12091260/s1), Figure S1: Analysis of the total ion current (TIC) in different quality control (QC) samples. The abscissa represents the retention time (min) of metabolite detection, and the ordinate represents the intensity (cps: count per second) of the ion current. Figure S2: Metabolites difference between leaves of H11 (green leaves) and H12 (red leaves). (a) Compared H12 with H11, most isoflavone and flavone metabolites were up-regulated based on relative quantitative contents. (b) The up-regulation of major flavanone, flavonol, anthocyanidin and proanthocyanidin metabolites. (c) The down-regulation of most amino acid derivatives and organic acids. The darker the color, the higher the metabolites expression level. Figure S3: Go classification of different expression genes in leaf transcriptomes of *E. ulmoides* among different samples. Figure S4: KEGG enrichment of down-regulated genes in H12 (red leaves) compared with H11 (green leaves) in *E. ulmoides*. Figure S5: Differential expression of the genes related to photosynthesis pathway. The expression level was based on FPKM value. The darker the color, the higher the gene expression level. Figure S6: Phylogeny of all EuMYBs and AtMYBs. Those MYBs involved in flavonoids biosynthesis were focused. Phylogenetic analysis followed the settings: the maximum likelihood method, the substitution model was Dayhoff, priors set to the Yule Model, the birth rate was 1.0, the mcmc chain length was 10,000,000, bootstrapping set to 1,000, and the TreeAnnotator program set the posterior probability limit to 1.0 with a burn in percentage of 90. The scale bar indicates the average number of amino acid substitutions per site. Figure S7: Phylogeny of all EubHLHs and AtbHLHs. Phylogenetic analysis followed the above settings. Figure S8. qRT-PCR analysis of the expression of candidate genes in *E. ulmoides* leaves. Table S1: Primer sequences of genes for RT-qPCR verification. Table S2: Candidate genes involved in chlorophyll metabolism pathway. Table S3: Candidate genes involved in photosynthesis pathway. Table S4. Candidate genes related to flavonoids biosynthesis pathway. Table S5: The DEGs of gene family compared H11 (green leaves) and H12 (red leaves). Table S6: The expression profile of EuMYBs and EubHLHs transcripts related to flavonoids synthesis. Table S7: The node genes of flavonol and anthocyanin biosynthesis.

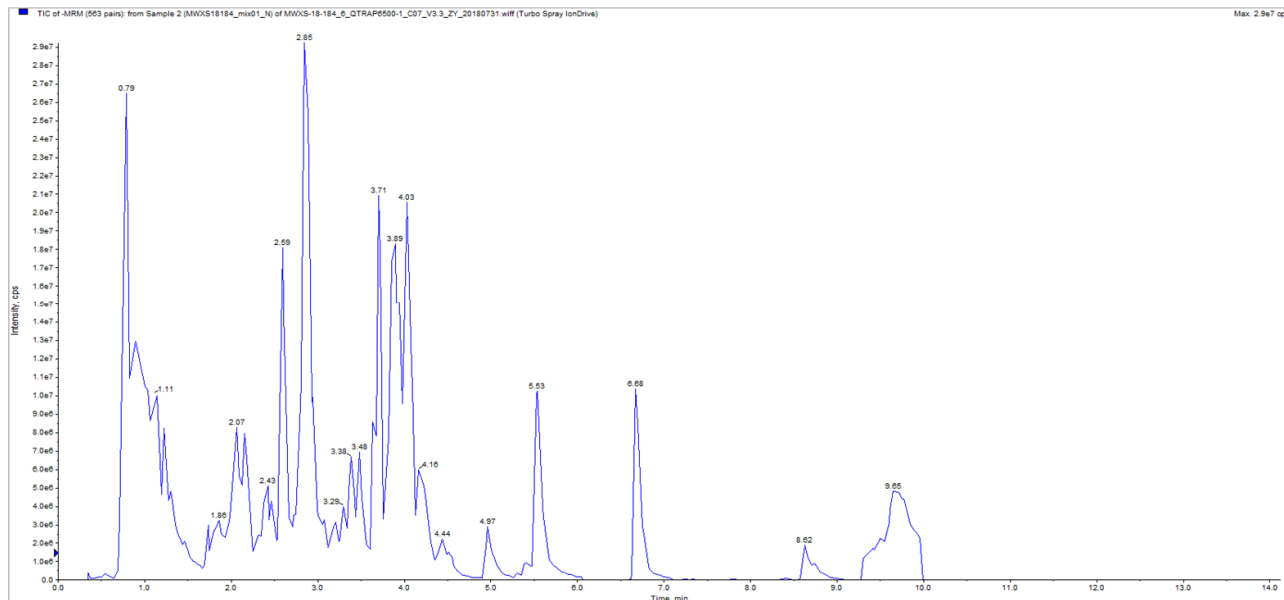

**Figure S1.** Analysis of the total ion current (TIC) in different quality control (QC) samples. The abscissa represents the retention time (min) of metabolite detection, and the ordinate represents the intensity (cps: count per second) of the ion current.

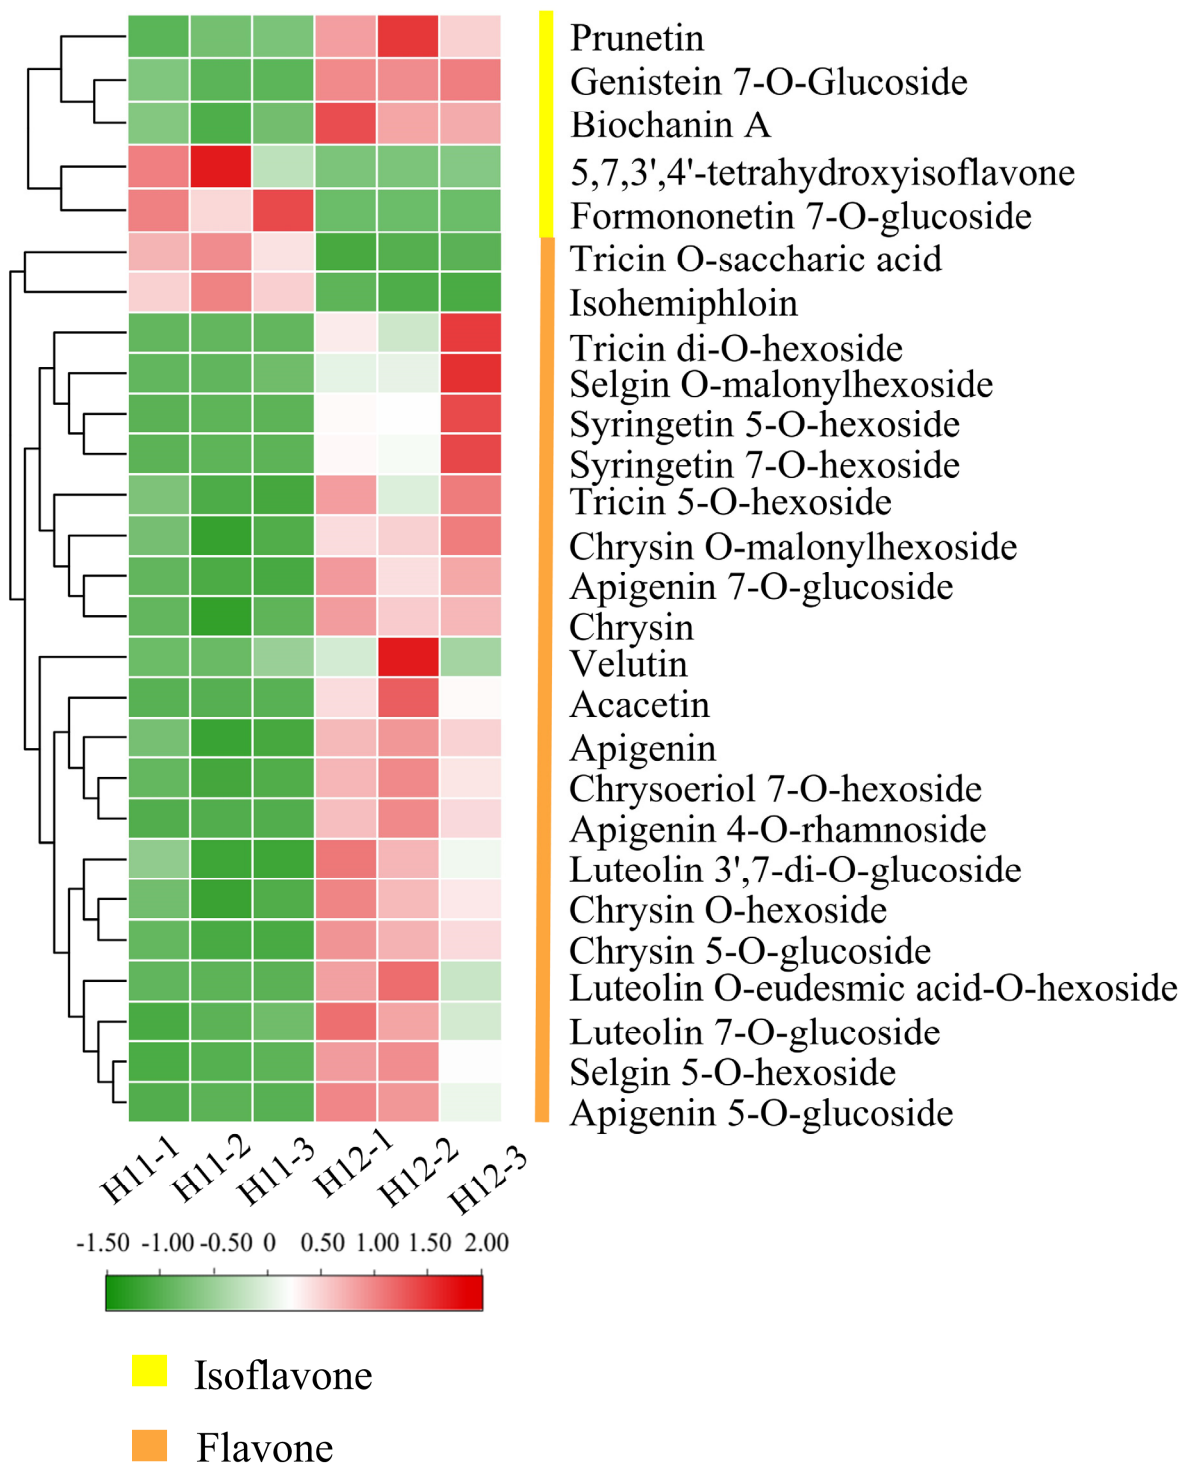

(a)

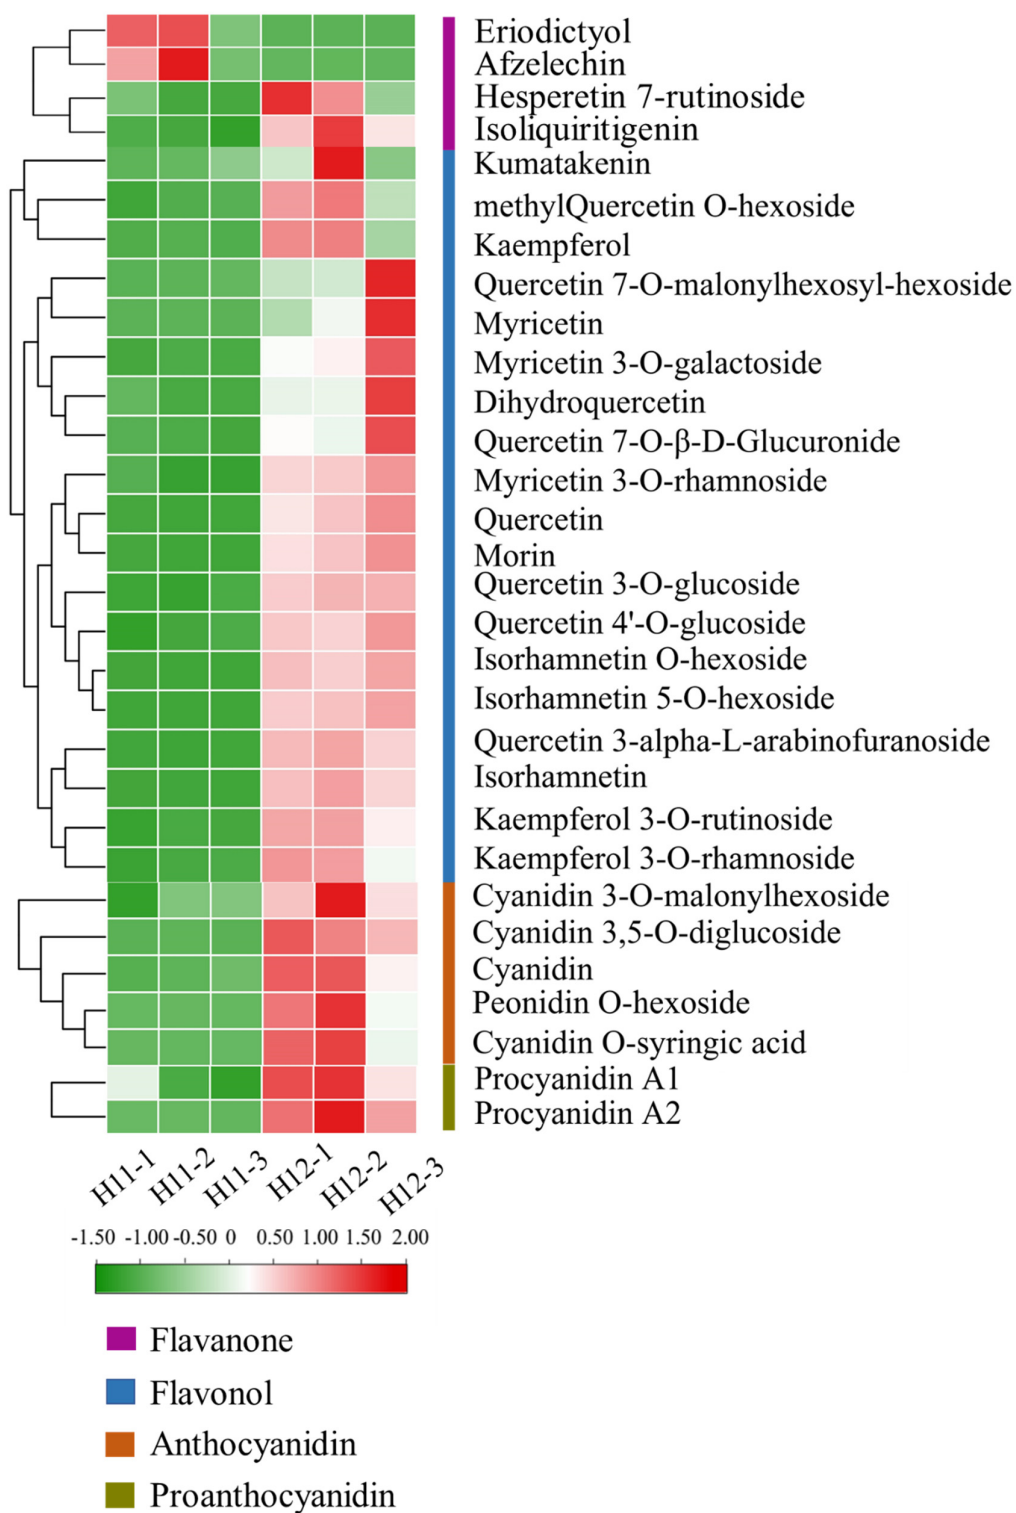

(b)

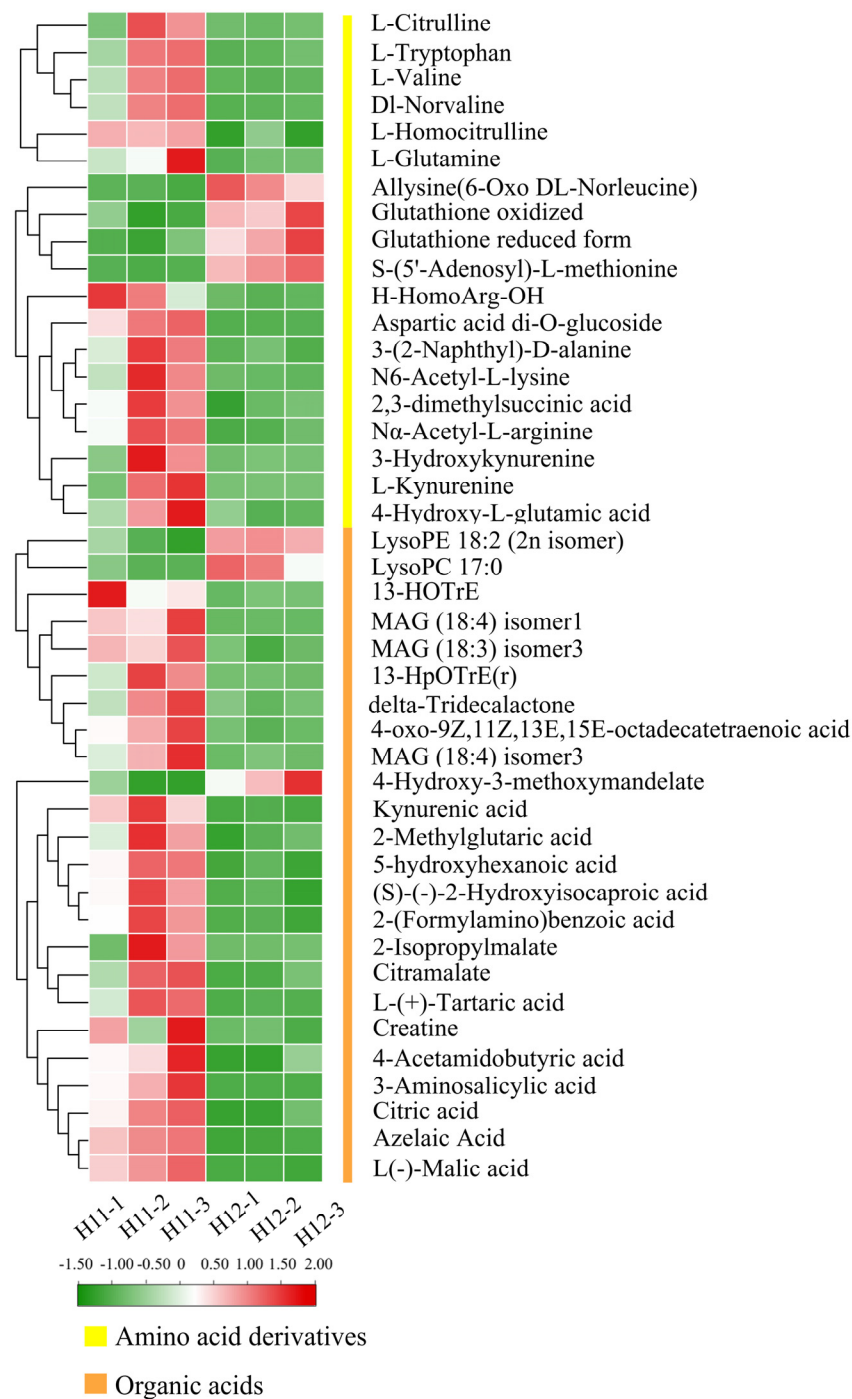

(c)

**Figure S2.** Metabolites difference between leaves of H11 (green leaves) and H12 (red leaves). (a) Compared H12 with H11, most isoflavone and flavone metabolites were up-regulated based on relative quantitative contents. (b) The up-regulation of major flavanone, flavonol, anthocyanidin and proanthocyanidin metabolites. (c) The down-regulation of most amino acid derivatives and organic acids. The darker the color, the higher the metabolites expression level.

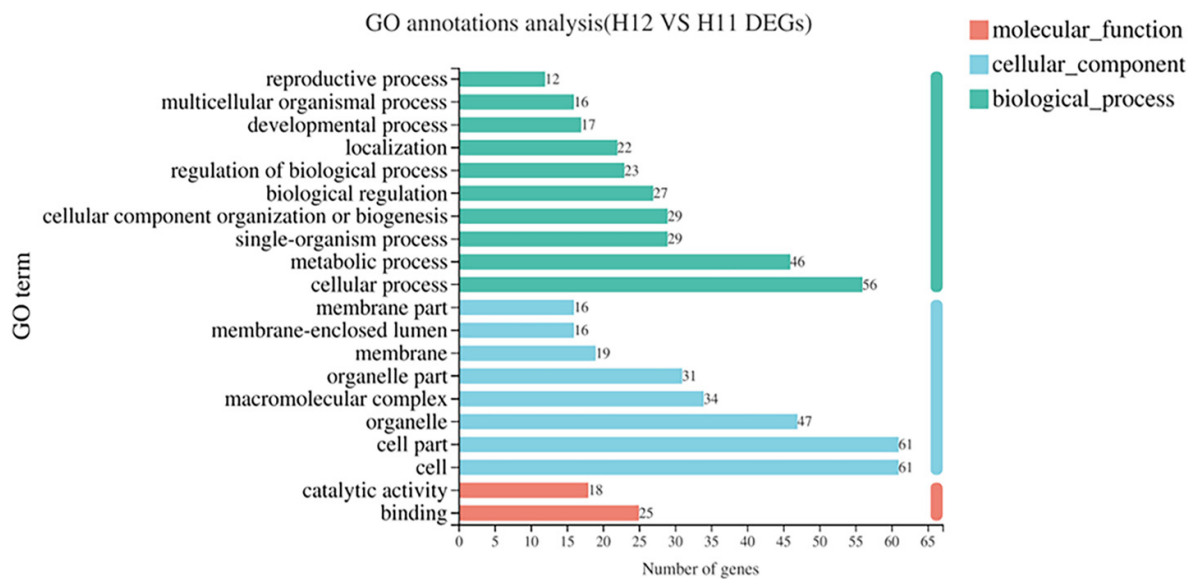

**Figure S3.** Go classification of different expression genes in in leaf transcriptomes of *E. ulmoides* among different samples.

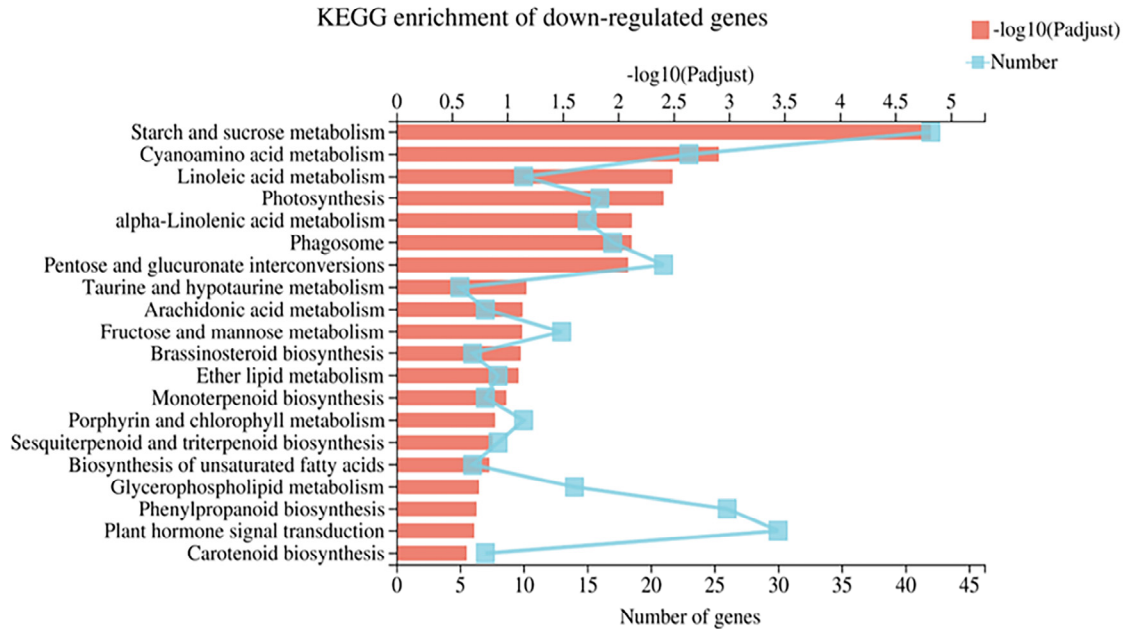

**Figure S4.** KEGG enrichment of down-regulated genes in H12 (red leaves) compared with H11 (green leaves) in *E. ulmoides*.

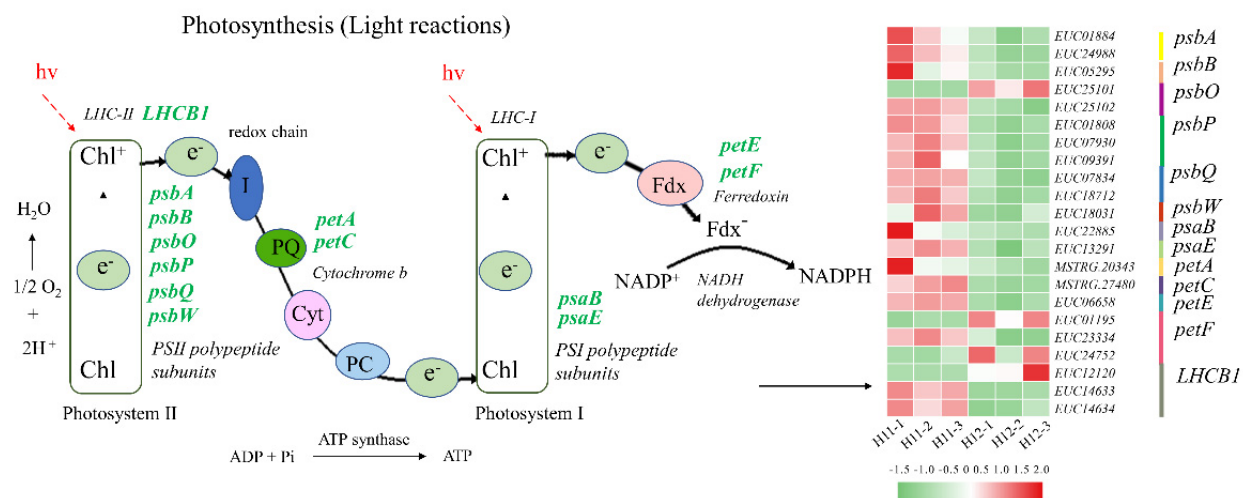

**Figure S5.** Differential expression of the genes related to photosynthesis pathway. The expression level was based on FPKM value. The darker the color, the higher the gene expression level.

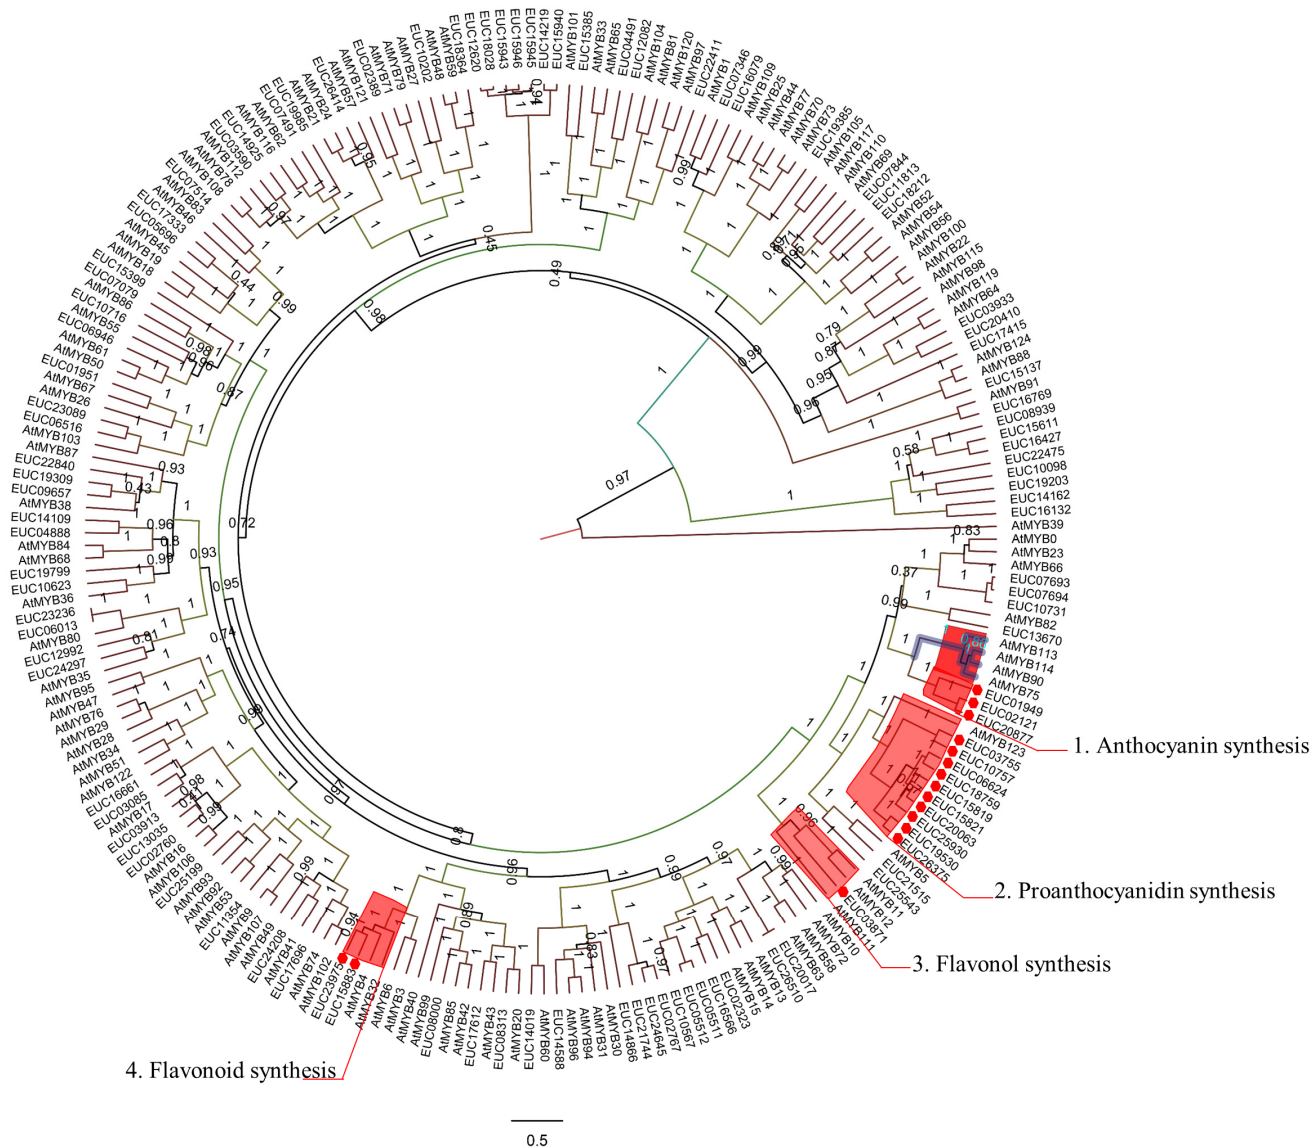

**Figure S6.** Phylogeny of all EuMYBs and AtMYBs. Those MYBs involved in flavonoids biosynthesis were focused. Phylogenetic analysis followed the settings: the maximum likelihood method, the substitution model was Dayhoff, priors set to the Yule Model, the birth rate was 1.0, the mcmc chain length was 10,000,000, bootstrapping set to 1,000, and the TreeAnnotator program set the posterior probability limit to 1.0 with a burn in percentage of 90. The scale bar indicates the average number of amino acid substitutions per site.

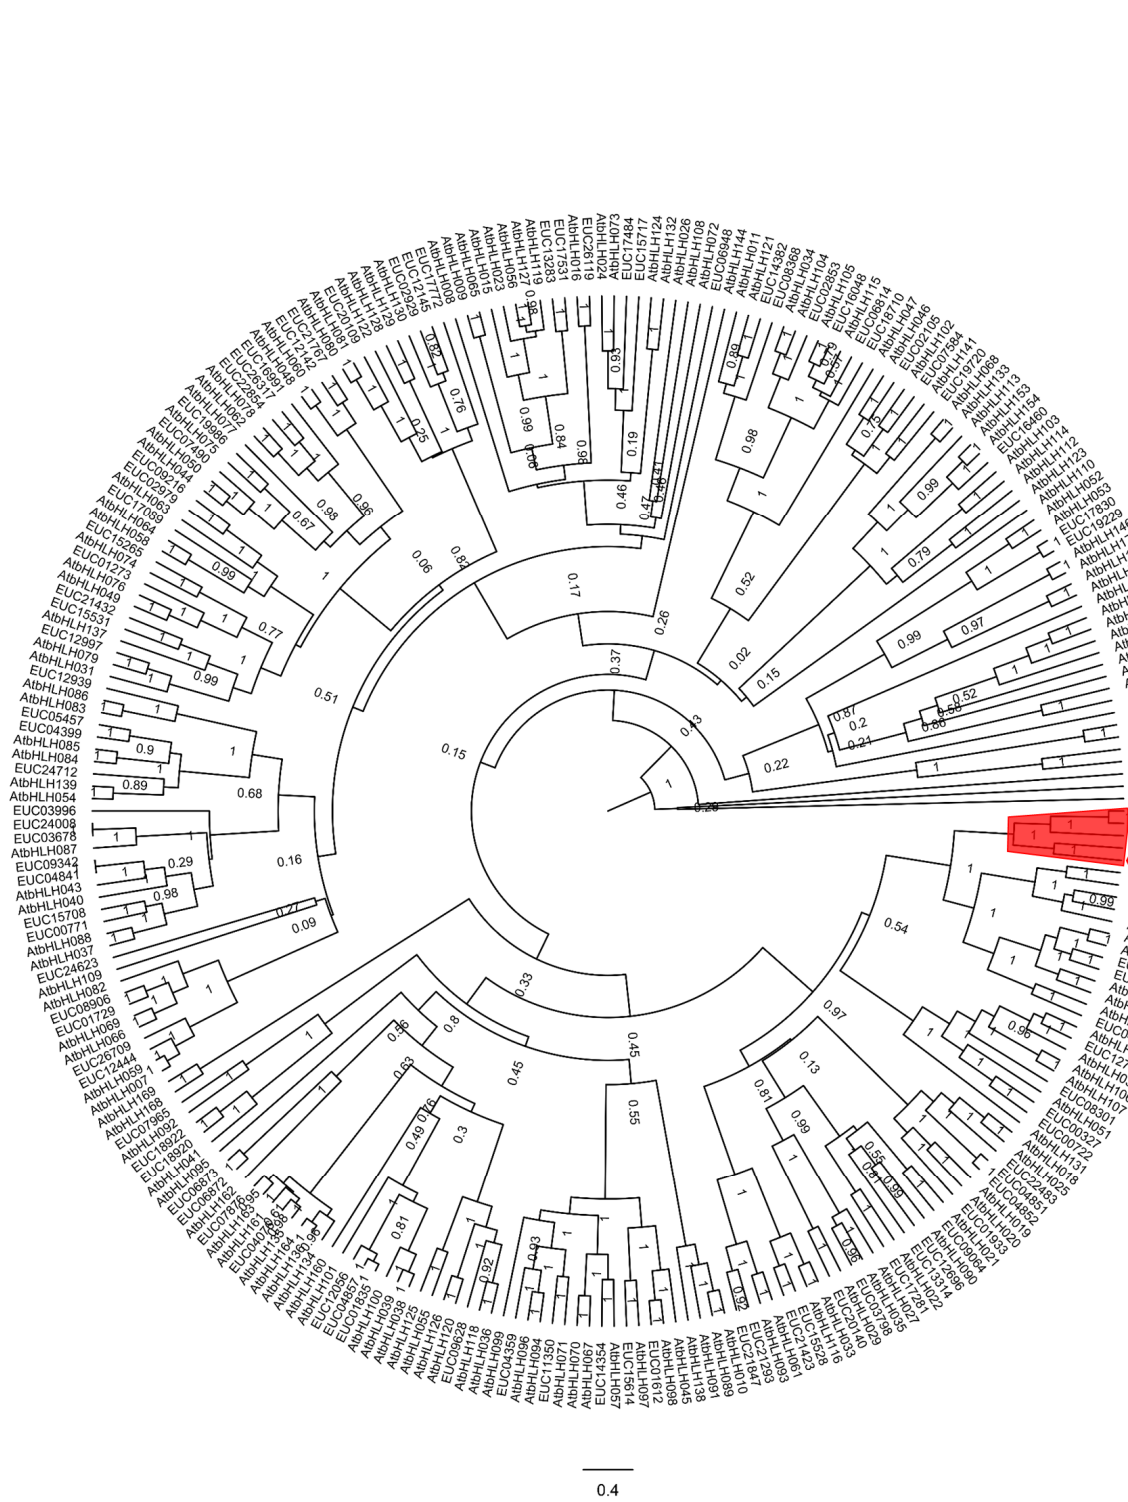

Figure S7. Phylogeny of all EubHLHs and AtbHLHs. Phylogenetic analysis followed the above settings.

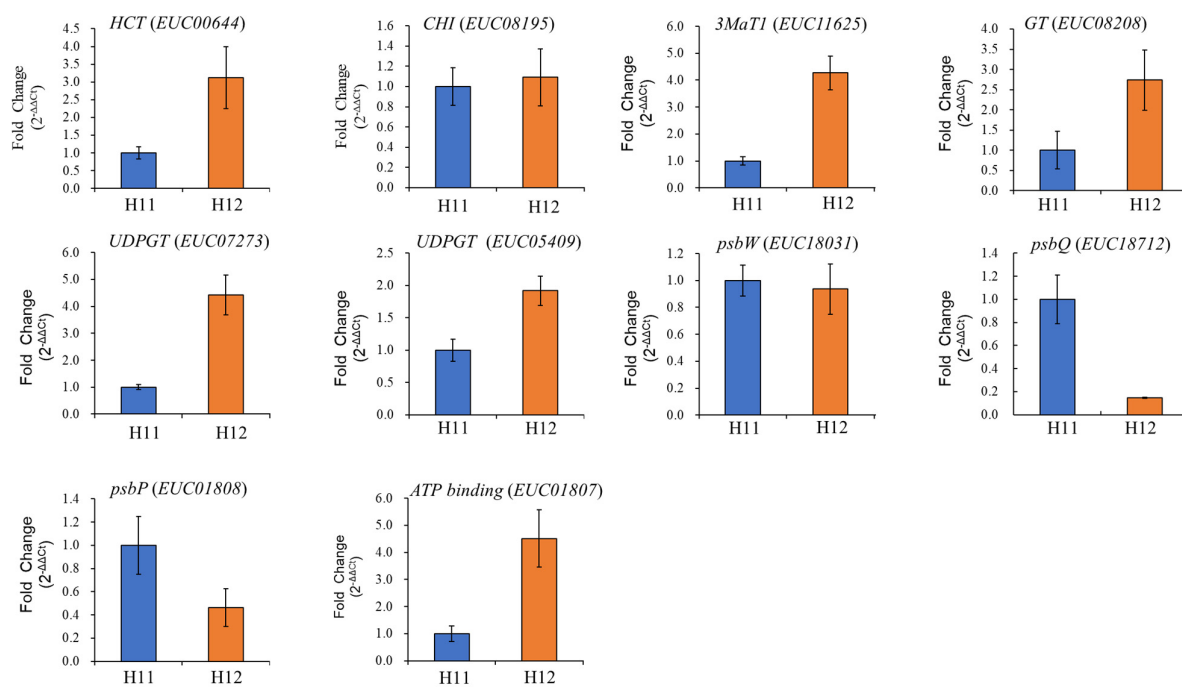

**Figure S8.** qRT-PCR analysis of the expression of candidate genes in *E. ulmoides* leaves.

**Table S1.** Primer sequences of genes for RT-qPCR verification

| Gene name       | Gene category      | Forward primer           | Reverse primer           |
|-----------------|--------------------|--------------------------|--------------------------|
| <i>EUC05716</i> | <i>GAPDH</i>       | ATGAAATCAAGGCCGCCATC     | TCGGTATACCCCAAGATGCC     |
| <i>EUC00644</i> | <i>HCT</i>         | CCGGCATGACAGCAGACAGC     | CGGACTCACTCGTTGCCATTACC  |
| <i>EUC08195</i> | <i>CHI</i>         | GCCACAAGGATCTCCGACTTACTG | CTCCGCCATTCTCCAACACCATC  |
| <i>EUC11625</i> | <i>3MaT1</i>       | GCAGCTAATGAGTCGTCTGAGTCG | GCCGTGGTGATTGGTGAAGCC    |
| <i>EUC08208</i> | <i>UFOG6</i>       | TTCGAGCTGGAATCACAGGCAATC | CAGCAGAGGTGGAGTTGTTGTCTG |
| <i>EUC07273</i> | <i>UDPGT</i>       | CCTGAAGTGGCTCGACGATCAAC  | TTGGTCAACGCCGAAGCATCC    |
| <i>EUC05409</i> | <i>UDPGT</i>       | GACCAGGTGACGAACGCCAAG    | TTCTTCCACTTCAACGCCTTCTCC |
| <i>EUC18031</i> | <i>psbW</i>        | TGGTGGACGAGAGGATGAGCAC   | CAAGCCGAACACTCCGAACAGG   |
| <i>EUC18712</i> | <i>psbQ</i>        | AGCCACTGTCGCCAGCAGAG     | CTTCGCTGAGATCACGGTGTGAG  |
| <i>EUC01808</i> | <i>psbP</i>        | CTTGACAAGGACAGCCGATGGAG  | TGTAGAGCTTGCCACCATTACAG  |
| <i>EUC01807</i> | <i>ATP binding</i> | CCCTGCCCAACATCAAGGTC     | TGTCCTTGCCTCCCCAGAT      |

**Table S2.** Candidate genes involved in chlorophyll metabolism pathway.

| Function                   | Gene        | Enzyme                                                              | Total<br>No. | DEG<br>No. |
|----------------------------|-------------|---------------------------------------------------------------------|--------------|------------|
| ALA formation              | <i>HemA</i> | Glutamyl-tRNA reductase                                             | 2            | 0          |
|                            | <i>HemL</i> | Glutamate-1-semialdehyde 2,1-aminomutase                            | 5            | 0          |
| Proto IX<br>formation      | <i>HemB</i> | Porphobilinogen synthase                                            | 1            | 0          |
|                            | <i>HemC</i> | Hydroxymethylbilane synthase                                        | 4            | 0          |
|                            | <i>HemD</i> | Uroporphyrinogen-III synthase                                       | 1            | 0          |
|                            | <i>HemE</i> | Uroporphyrinogen decarboxylase                                      | 2            | 1          |
|                            | <i>HemF</i> | Coproporphyrinogen-III oxidase                                      | 2            | 1          |
|                            | <i>HemY</i> | Oxygen-dependent protoporphyrinogen oxidase                         | 1            | 0          |
| Chlorophyll<br>formation   | <i>chlH</i> | Magnesium chelatase subunit H                                       | 1            | 1          |
|                            | <i>chlM</i> | Magnesium protoporphyrin IX<br>methyltransferase                    | 1            | 0          |
|                            | <i>chlE</i> | Magnesium-protoporphyrin IX monomethyl<br>ester (oxidative) cyclase | 1            | 0          |
|                            | <i>DVR</i>  | Divinyl chlorophyllide-a 8-vinyl-reductase                          | 3            | 3          |
|                            | <i>POR</i>  | Protochlorophyllide reductase                                       | 4            | 3          |
|                            | <i>chlG</i> | Chlorophyll synthase                                                | 6            | 3          |
| Chlorophyll cycle          | <i>CAO</i>  | Chlorophyllide a oxygenase                                          | 2            | 0          |
|                            | <i>CLH</i>  | Chlorophyllase                                                      | 5            | 0          |
|                            | <i>NYC1</i> | Chlorophyll (ide) b reductase                                       | 4            | 0          |
|                            | <i>HCAR</i> | 7-Hydroxymethyl chlorophyll a reductase                             | 1            | 0          |
| Chlorophyll<br>degradation | <i>PAO</i>  | Pheophorbide a oxygenase                                            | 1            | 0          |
|                            | <i>RCCR</i> | Red chlorophyll catabolite reductase                                | 1            | 0          |

**Table S3.** Candidate genes involved in photosynthesis pathway.

| Function                                | Gene         | Enzyme                                                           | Total<br>No. | DEG<br>No. |
|-----------------------------------------|--------------|------------------------------------------------------------------|--------------|------------|
| photosystem II                          | <i>psbA</i>  | photosystem II P680 reaction center D1 protein                   | 4            | 2          |
|                                         | <i>psbB</i>  | photosystem II CP47 chlorophyll apoprotein                       | 4            | 1          |
|                                         | <i>psbO</i>  | photosystem II oxygen-evolving enhancer protein 1                | 2            | 2          |
|                                         | <i>psbP</i>  | photosystem II oxygen-evolving enhancer protein 2                | 4            | 3          |
|                                         | <i>psbQ</i>  | photosystem II oxygen-evolving enhancer protein 3                | 4            | 2          |
|                                         | <i>psbW</i>  | photosystem II PsbW protein                                      | 1            | 1          |
| photosystem I                           | <i>psaB</i>  | photosystem I P700 chlorophyll-a apoprotein A2                   | 4            | 1          |
|                                         | <i>psaE</i>  | photosystem I subunit IV                                         | 3            | 1          |
| cytochrome                              | <i>petA</i>  | apocytochrome f                                                  | 1            | 1          |
| b6/f complex                            | <i>petC</i>  | cytochrome b6-f complex iron-sulfur subunit                      | 3            | 1          |
| photosynthetic<br>electron<br>transport | <i>petE</i>  | plastocyanin                                                     | 1            | 1          |
|                                         | <i>petF</i>  | ferredoxin                                                       | 6            | 3          |
| Photosynthesis-<br>antenna<br>proteins  | <i>LHCB1</i> | light-harvesting complex II chlorophyll a/b binding<br>protein 1 | 7            | 3          |

**Table S4.** Candidate genes related to flavonoids biosynthesis pathway.

| Function                             | Gene          | Enzyme                                               | Total<br>No. | DEG<br>No. |
|--------------------------------------|---------------|------------------------------------------------------|--------------|------------|
| Phenylpropanoid synthesis<br>pathway | <i>PAL</i>    | Phenylalanine ammonia-lyase                          | 6            | 2          |
|                                      | <i>4CL</i>    | 4-Coumarate: CoA ligase                              | 5            | 0          |
| Flavonoid synthesis<br>pathway       | <i>CHS</i>    | Chalcone synthase                                    | 2            | 0          |
|                                      | <i>CHI</i>    | Chalcone isomerase                                   | 1            | 1          |
|                                      | <i>F3H</i>    | Flavanone 3-hydroxylase                              | 1            | 0          |
|                                      | <i>F3'H</i>   | Flavonoid 3'-hydroxylase                             | 1            | 1          |
|                                      | <i>F3'5'H</i> | Flavonoid-3', 5' - hydroxylase                       | 1            | 1          |
| Anthocyanin synthesis<br>pathway     | <i>DFR</i>    | Dihydroflavonol 4-reductase                          | 13           | 11         |
|                                      | <i>ANS</i>    | Anthocyanidin synthase                               | 2            | 0          |
|                                      | <i>UGT</i>    | UDP-glucose: anthocyanidin 3-O-glucosyltransferase   | 1            | 1          |
|                                      | <i>3MatI</i>  | anthocyanin 3-O-glucoside-6'-O-malonyltransferase    | 1            | 1          |
|                                      | <i>3GGT</i>   | anthocyanidin 3-O-glucoside 2"-O-glucosyltransferase | 1            | 0          |
| Flavonol synthesis                   | <i>FLS</i>    | Flavonol synthase                                    | 2            | 0          |
| Procyanidin                          | <i>LAR</i>    | Leucoanthocyanin reductase                           | 6            | 0          |
|                                      | <i>ANR</i>    | Anthocyanidin reductase                              | 2            | 0          |

**Table S5.** The DEGs of gene family compared H11 (green leaves) and H12 (red leaves).

| TF family           | H11_vs_H12 |      | Total |
|---------------------|------------|------|-------|
|                     | Up         | Down |       |
| MYB and MYB-related | 9          | 6    | 15    |
| bHLH                | 5          | 12   | 17    |
| C2C2                | 14         | 13   | 27    |
| NAC                 | 9          | 7    | 16    |
| B3 superfamily      | 8          | 5    | 13    |
| HB                  | 7          | 2    | 9     |
| GRAS                | 4          | 5    | 9     |
| AP2/ERF             | 12         | 8    | 20    |
| bZIP                | 15         | 5    | 20    |

**Table S6.** The expression profile of EuMYBs and EubHLHs transcripts related to flavonoids synthesis.

| Function                      | Transcript ID | Homologous sequence | H11_tpm | H12_tpm | log2FC (H12/H11) | Significant | Regulate  |
|-------------------------------|---------------|---------------------|---------|---------|------------------|-------------|-----------|
| Anthocyanin biosynthesis      | EUC02121      | AtMYB75,            | 2.29    | 2.52    | 0.28             | no          | up        |
|                               | EUC01949      | AtMYB113,           | 0       | 0.04    | 0                | no          | no change |
|                               | EUC20877      | AtMYB114            | 0.02    | 0.11    | 0                | no          | no change |
| Proanthocyanidin biosynthesis | EUC25930      | AtMYB123            | 16.15   | 11.74   | -0.35            | no          | down      |
|                               | EUC03755      |                     | 0.03    | 0       | 0                | no          | no change |
|                               | EUC10757      |                     | 0.06    | 0       | 0                | no          | no change |
|                               | EUC06624      |                     | 0.08    | 0       | 0                | no          | no change |
|                               | EUC18759      |                     | 0.21    | 0       | 0                | no          | no change |
|                               | EUC20063      |                     | 0.04    | 0.12    | 0                | no          | no change |
|                               | EUC26375      |                     | 0       | 0       | 0                | no          | no change |
| Flavonol synthesis            | EUC03871      | AtMYB11             | 4.54    | 6.59    | 0.36             | no          | up        |
| Flavonoid synthesis           | EUC23975      | AtMYB4              | 3.84    | 9.85    | 1.22             | yes         | up        |
|                               | EUC15883      |                     | 26.52   | 20.53   | -0.34            | no          | down      |
| Flavonoid synthesis           | EUC06643      | bHLH042/TT8         | 18.98   | 55.61   | 1.52             | yes         | up        |

**Table S7.** The node genes of flavonol and anthocyanin biosynthesis.

| Gene            | Gene Id            | Significant | Regulate |
|-----------------|--------------------|-------------|----------|
| <i>EuPAL1</i>   | <i>EUC19549</i>    | yes         | up       |
| <i>EuPAL2</i>   | <i>MSTRG.7756</i>  | yes         | down     |
| <i>EuCHI</i>    | <i>EUC08195</i>    | yes         | up       |
| <i>EuF3'5'H</i> | <i>EUC01284</i>    | yes         | down     |
| <i>EuF3'H</i>   | <i>EUC03526</i>    | yes         | up       |
| <i>EuDFR1</i>   | <i>EUC00272</i>    | yes         | up       |
| <i>EuDFR2</i>   | <i>MSTRG.13706</i> | yes         | up       |
| <i>EuDFR3</i>   | <i>MSTRG.13719</i> | yes         | up       |
| <i>EuDFR4</i>   | <i>MSTRG.15870</i> | yes         | up       |
| <i>EuDFR5</i>   | <i>MSTRG.15871</i> | yes         | up       |
| <i>EuDFR6</i>   | <i>MSTRG.24809</i> | yes         | up       |
| <i>EuDFR7</i>   | <i>MSTRG.14354</i> | yes         | up       |
| <i>EuDFR8</i>   | <i>MSTRG.17635</i> | yes         | up       |
| <i>EuDFR9</i>   | <i>MSTRG.18190</i> | yes         | up       |
| <i>EuDFR10</i>  | <i>MSTRG.18191</i> | yes         | up       |
| <i>EuDFR11</i>  | <i>MSTRG.18192</i> | yes         | up       |
| <i>Eu3MaT1</i>  | <i>EUC11625</i>    | yes         | up       |
